# Supplementary material for: Djck1α Is Required for Proper Regeneration and Maintenance of the Medial Tissues in Planarians
Source: MDPI journal article supplement (doi:10.3390/cells12030473), 2023-02-01
Supplement: s1 [file s1]

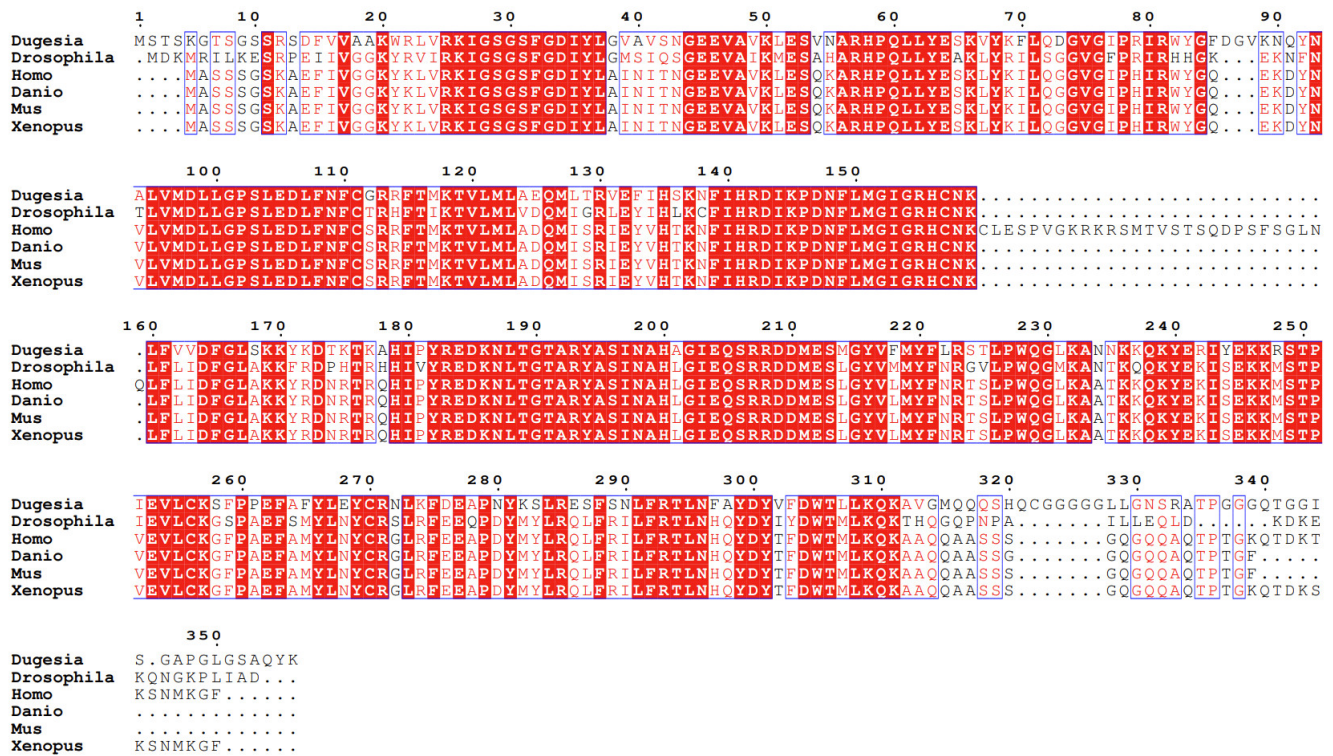

**Figure S1.** Multiple sequence alignment of Djck1α from *Dugesia japonica*, *Homo sapiens*, *Mus musculus*, *Drosophila serrata*, *Xenopus laevis*, and *Danio rerio*. Absolutely conserved residues are in red shaded boxes, and highly conserved residues are colored red and are boxed.

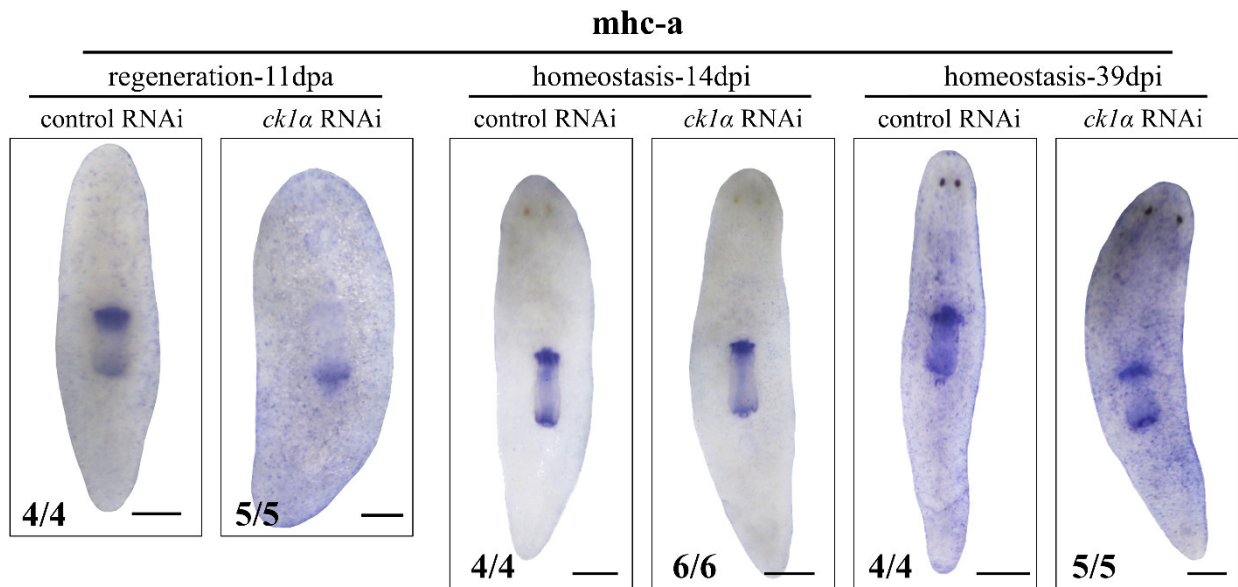

**Figure S2.** The WISH with Djmhc-a probes in *Djck1a* RNAi animals. Scale bars: 500 μm.

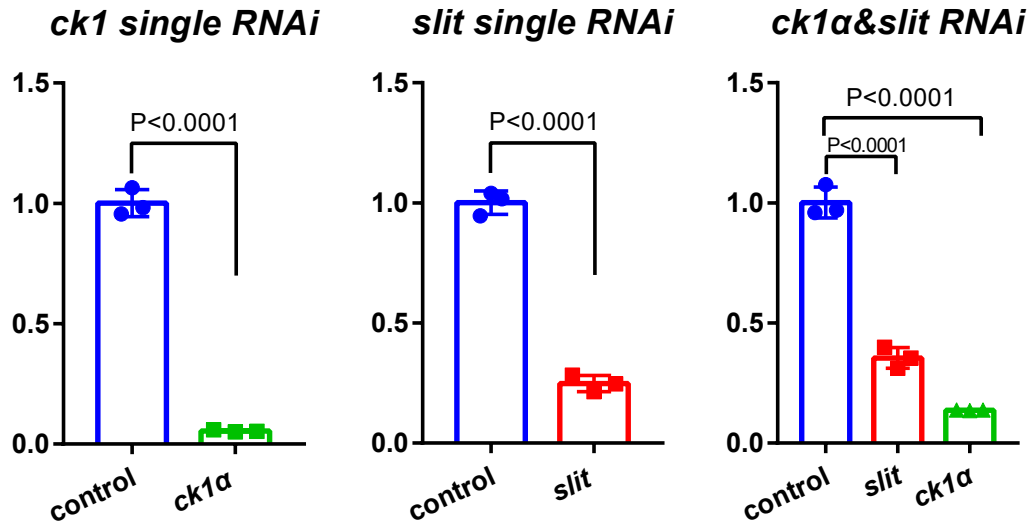

**Figure S3.** The down-regulation efficiency of *Djck1α* and *Djslit* in single and double RNAi animals. Left: the down-regulation efficiency of *ck1α* in *Djck1α* RNAi animals. Middle: the down-regulation efficiency of *slit* in *Djslit* RNAi animals. Right: the down-regulation efficiency of *ck1α* and *slit* in *Djck1α* and *Djslit* RNAi animals. unpaired Student's t-test, Mean  $\pm$  SD. \*  $p < 0.05$ .

## related gene expression after *ck1α* RNAi-48h

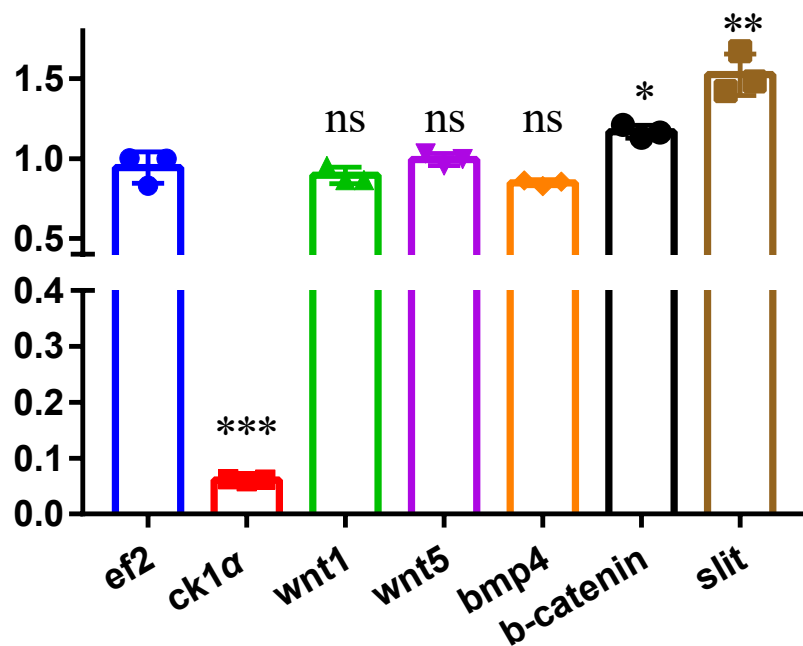

## related gene expression after *ck1α* RNAi-8d

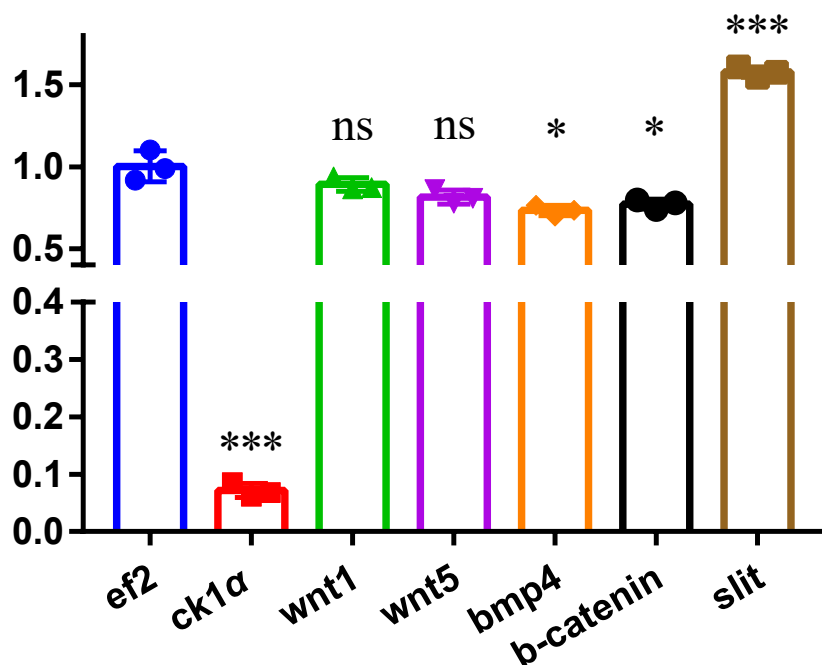

**Figure S4.** Related gene expression after *ck1α* RNAi. Upper: Related gene expression at 48h post the last injection. Below: Related gene expression at 8days post the last injection. unpaired Student's t-test, Mean  $\pm$  SD. \*  $p < 0.05$ .

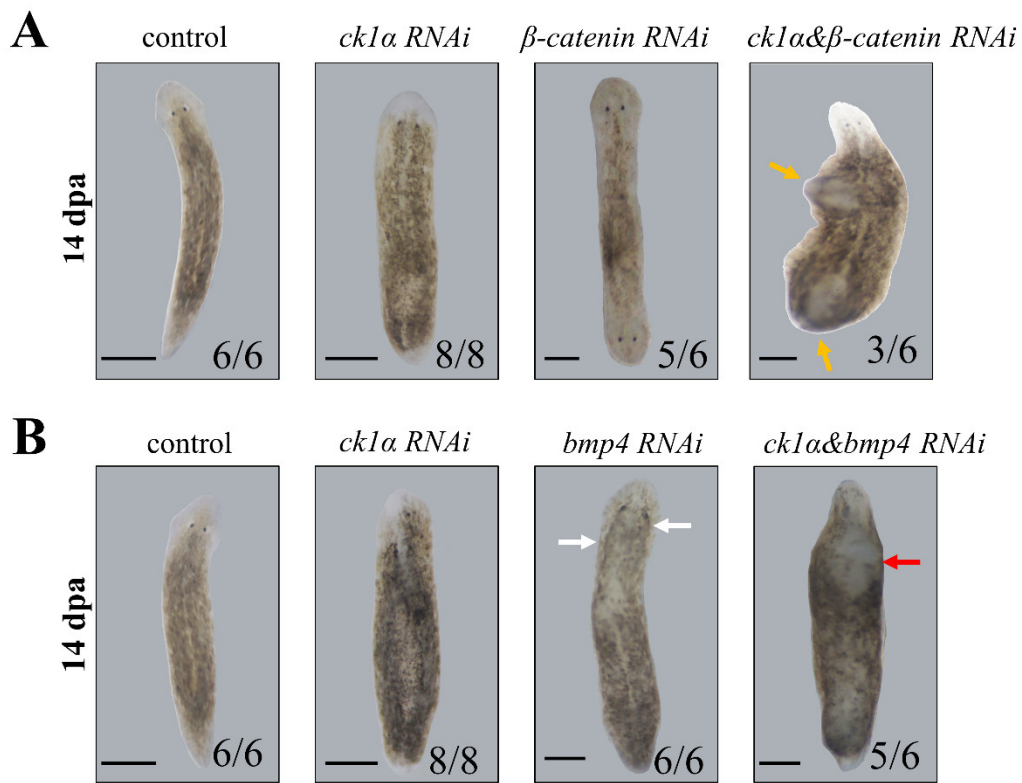

**Figure S5.** Regeneration defects induced by the double RNAis. Regeneration defects induced by *ck1a*& $\beta$ -catenin RNAi. Orange arrows: ‘outgrowth’ in the *ck1a*& $\beta$ -catenin RNAi animals at 14dpa. (B) Regeneration defects induced by *ck1a*&*bmp4* RNAi. White arrows: the body appears thicker in *bmp4* RNAi animals. Red arrow: in *ck1a*&*bmp4* RNAi animals, the body became thicker than *bmp4* RNAi animals. Scale bars: 500  $\mu$ m.

**Table S1.** PCR primers used in this study.

|                                         |                                           |
|-----------------------------------------|-------------------------------------------|
| <b>Djck1<math>\alpha</math>F</b>        | ACAAGTGGTAGCAGTAGGTCA                     |
| <b>Djck1<math>\alpha</math>R</b>        | GCCTTAGTCTTCGTATCCTT                      |
| <b>T7-Djck1<math>\alpha</math>F</b>     | TAATACGACTCACTATAGGACAAGTGGTAGCAGTAGGTCA  |
| <b>T7-Djck1<math>\alpha</math>R</b>     | TAATACGACTCACTATAGGGCCTTAGTCTTCGTATCCTT   |
| <b>DjslitF</b>                          | TCCAGTGTGCAAGTGAAGACA                     |
| <b>DjslitR</b>                          | CACACCCTCAAAAGCATCAGC                     |
| <b>T7-DjslitF</b>                       | TAATACGACTCACTATAGGTCCAGTGTGCAAGTGAAGACA  |
| <b>T7-DjslitR</b>                       | TAATACGACTCACTATAGGCACACCCTCAAAAGCATCAGC  |
| <b>Dj<math>\beta</math>-cateninF</b>    | GCAATATCAACATATGCATCAG                    |
| <b>Dj<math>\beta</math>-cateninR</b>    | GACATTTGATGAGGTGTAGG                      |
| <b>T7-Dj<math>\beta</math>-cateninF</b> | TAATACGACTCACTATAGGGCAATATCAACATATGCATCAG |
| <b>T7-Dj<math>\beta</math>-cateninR</b> | TAATACGACTCACTATAGGGACATTTGATGAGGTGTAGG   |
| <b>Djbmp4F</b>                          | AATCGACAATTTCCGACACG                      |
| <b>Djbmp4R</b>                          | CGTCAACGACAAGAACAAC                       |
| <b>T7- Djbmp4F</b>                      | TAATACGACTCACTATAGGAATCGACAATTTCCGACACG   |
| <b>T7-Djbmp4R</b>                       | TAATACGACTCACTATAGGCGTCAACGACAAGAACAAC    |
| <b>qPCR- Djck1<math>\alpha</math>F</b>  | ACAAGAATCTGACCGGCACC                      |
| <b>qPCR- Djck1<math>\alpha</math>R</b>  | TGAACACGTAGCCCATCGAC                      |
| <b>qPCR-DjslitF</b>                     | ACGGGTTTGAGCTCTCTTCC                      |
| <b>qPCR-DjslitR</b>                     | TGGTGCTTCGTGAACGGAAT                      |
| <b>qPCR-piwiF</b>                       | GAATGAGAGAAGGTCCCAGTTT                    |
| <b>qPCR-piwiR</b>                       | GAAGCCGTTCCATCATCATTTG                    |
| <b>qPCR-wnt1F</b>                       | GGACGCAGATTGCGAGAAA                       |
| <b>qPCR-wnt1R</b>                       | AACCGCTTGTTCTTGGCAT                       |
| <b>qPCR-wnt5F</b>                       | GGAGGTACTGCCGTGGAAAA                      |
| <b>qPCR-wnt5R</b>                       | TTGACACTCCTCGATTCCGA                      |
| <b>qPCR-<math>\beta</math>-cateninF</b> | AAGCATGGAGGCCCATACAT                      |
| <b>qPCR-<math>\beta</math>-cateninR</b> | AGCCTCTGGCTAAAATGCGG                      |
| <b>qPCR-bmp4F</b>                       | GCACCCCAAACTATAATGCC                      |
| <b>qPCR-bmp4R</b>                       | TAAGGCACACAGCACGGTTT                      |
